# Supplementary material for: Carbonation of Sodium Aluminate/Sodium Carbonate Solutions for Precipitation of Alumina Hydrates—Avoiding Dawsonite Formation
Source: MDPI journal article supplement (doi:10.3390/cryst11070836), 2021-07-20
Supplement: s1 [file s1]

## Supplementary Materials

### Carbonation of Sodium Aluminate/Sodium Carbonate Solutions for Precipitation of Alumina Hydrates – Avoiding Dawsonite Formation.

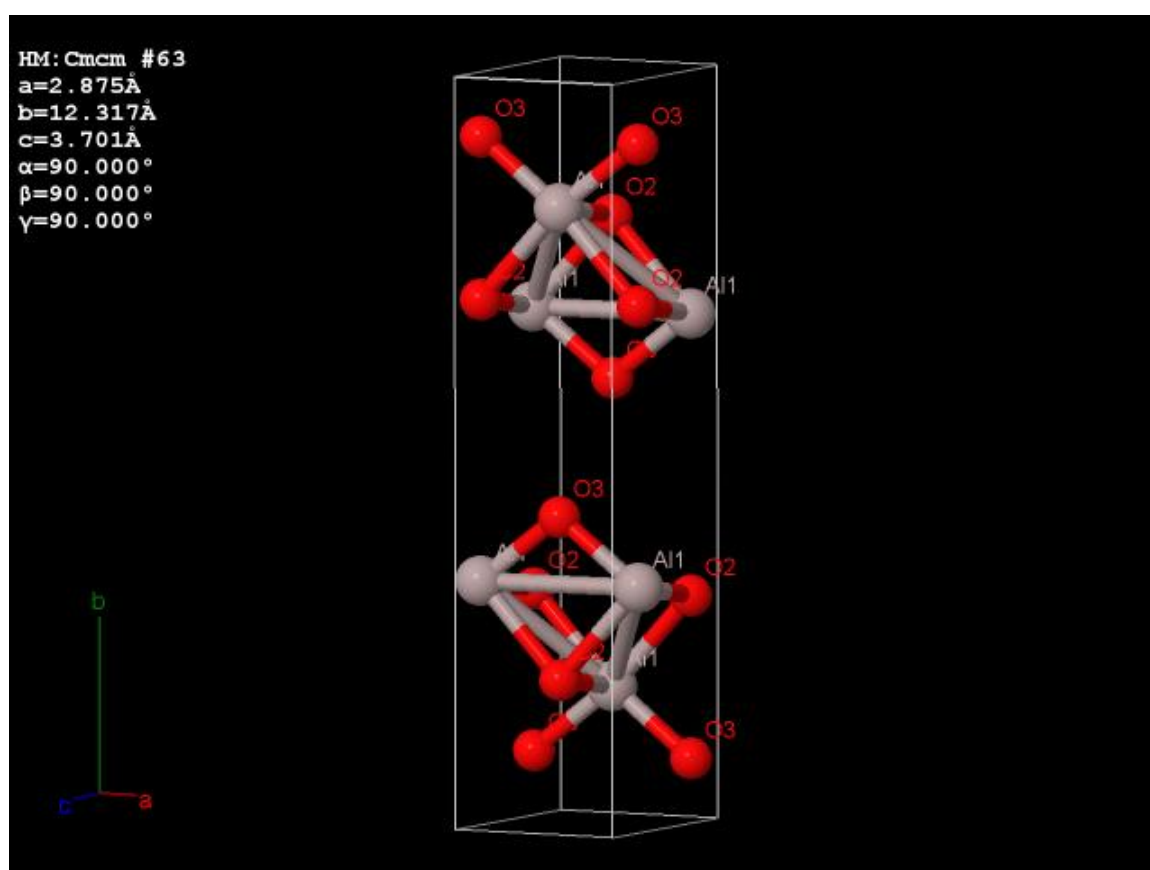

**Figure S1.** Crystal structure of boehmite. PDF 04-016-2858 [1].

**Table S1.** X-ray Powder Diffraction data for boehmite. PDF 04-016-2858 [1].

| <b>d(Å)</b> | <b>2Theta (°)</b> | <b>I</b> | <b>h</b> | <b>k</b> | <b>l</b> | <b>Comment</b> |
|-------------|-------------------|----------|----------|----------|----------|----------------|
| 6.1585      | 14.371            | 999      | 0        | 2        | 0        |                |
| 3.17199     | 28.109            | 500      | 0        | 2        | 1        |                |
| 3.07925     | 28.974            | 57       | 0        | 4        | 0        |                |
| 2.80011     | 31.936            | 5        | 1        | 1        | 0        |                |
| 2.35523     | 38.181            | 435      | 1        | 3        | 0        |                |
| 2.23293     | 40.36             | 1        | 1        | 1        | 1        |                |
| 2.05283     | 44.078            | 24       | 0        | 6        | 0        |                |
| 1.98695     | 45.62             | 42       | 1        | 3        | 1        |                |
| 1.87075     | 48.631            | 290      | 1        | 5        | 0        |                |
| 1.8503      | 49.204            | 195      | 0        | 0        | 2        |                |
| 1.79513     | 50.822            | 4        | 0        | 6        | 1        |                |
| 1.77205     | 51.532            | 45       | 0        | 2        | 2        |                |
| 1.66954     | 54.953            | 91       | 1        | 5        | 1        |                |
| 1.58599     | 58.115            | 10       | 0        | 4        | 2        |                |
| 1.54371     | 59.867            | 5        | 1        | 1        | 2        |                |
| 1.53963     | 60.042            | 45       | 0        | 8        | 0        |                |
| 1.50086     | 61.76             | 1        | 1        | 7        | 0        |                |
| 1.455       | 63.932            | 127      | 1        | 3        | 2        |                |
| 1.4377      | 64.795            | 62       | 2        | 0        | 0        |                |
| 1.4215      | 65.625            | 4        | 0        | 8        | 1        |                |
| 1.40006     | 66.76             | 18       | 2        | 2        | 0        |                |
| 1.39082     | 67.263            | 54       | 1        | 7        | 1        |                |
| 1.3744      | 68.176            | 13       | 0        | 6        | 2        |                |

It is pointed out that the entries of these tables, marked with red color, are highlighted in our experimental X-ray diffraction patterns, observed in Figure 2&4 of the manuscript.

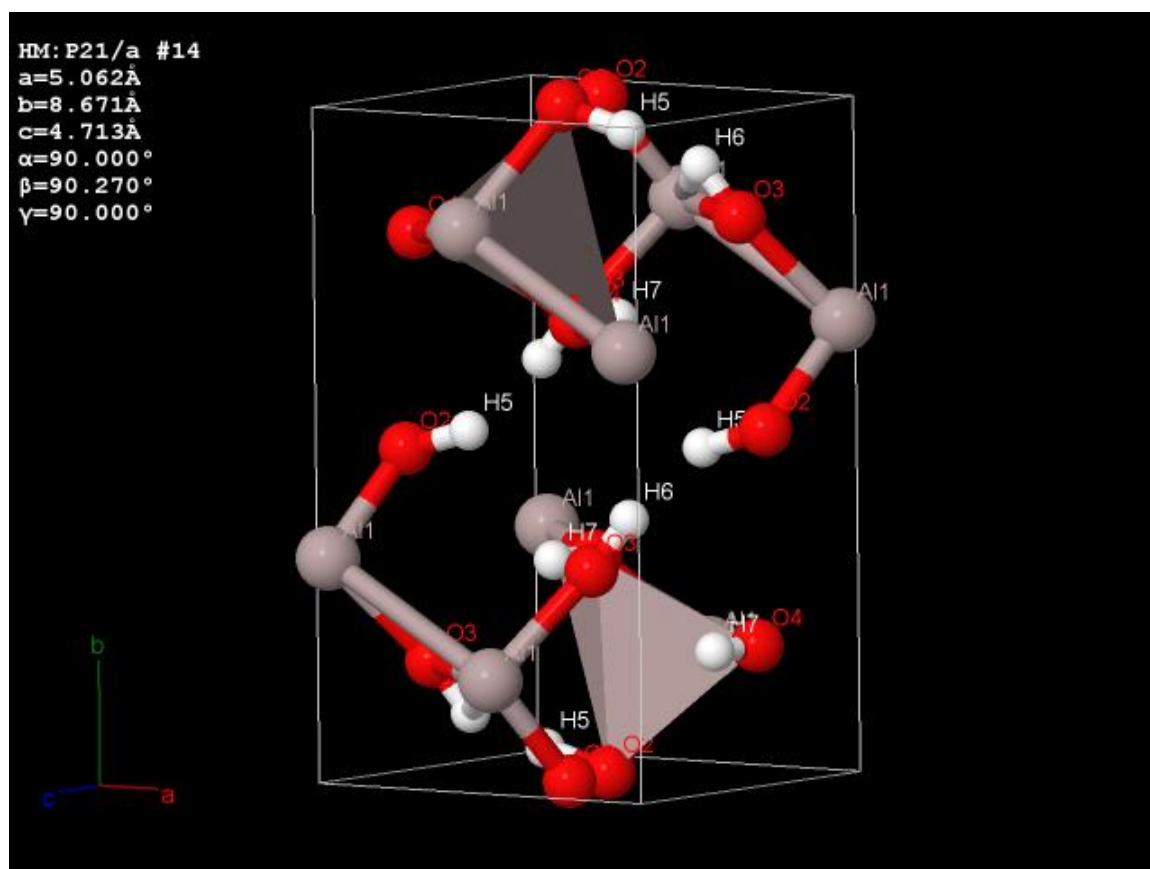

Figure S2. Crystal structure of bayerite. PDF 01-074-1119 [1].

Table S2. X-ray Powder Diffraction data for bayerite. PDF 01-074-1119 [1].

| d(Å)    | 2Theta (°) | I    | h | k | l  | Comment                    |
|---------|------------|------|---|---|----|----------------------------|
| 4.71295 | 18.814     | 1000 | 0 | 0 | 1  |                            |
| 4.37155 | 20.298     | 471  | 1 | 1 | 0  |                            |
| 4.3355  | 20.468     | 258  | 0 | 2 | 0  |                            |
| 4.14082 | 21.442     | 6    | 0 | 1 | 1  |                            |
| 3.29282 | 27.058     | 3    | 1 | 2 | 0  |                            |
| 3.21158 | 27.755     | 135  | 1 | 1 | −1 |                            |
| 3.19857 | 27.871     | 152  | 1 | 1 | 1  | Line with multiple indexes |
| 3.19857 | 27.871     | 152  | 0 | 2 | 1  |                            |
| 2.70316 | 33.113     | 35   | 1 | 2 | −1 |                            |
| 2.50998 | 35.744     | 4    | 1 | 3 | 0  |                            |
| 2.46389 | 36.436     | 23   | 0 | 3 | 1  |                            |
| 2.35647 | 38.16      | 49   | 0 | 0 | 2  |                            |
| 2.274   | 39.601     | 9    | 0 | 1 | 2  |                            |
| 2.23418 | 40.337     | 43   | 2 | 0 | −1 |                            |
| 2.22542 | 40.502     | 349  | 2 | 0 | 1  |                            |
| 2.21754 | 40.653     | 668  | 1 | 3 | −1 |                            |
| 2.18578 | 41.27      | 5    | 2 | 2 | 0  |                            |

|         |        |     |   |   |    |                            |
|---------|--------|-----|---|---|----|----------------------------|
| 2.16351 | 41.715 | 6   | 2 | 1 | −1 |                            |
| 2.15556 | 41.876 | 21  | 2 | 1 | 1  |                            |
| 2.07783 | 43.52  | 8   | 1 | 1 | −2 |                            |
| 2.07078 | 43.676 | 29  | 1 | 1 | 2  | Line with multiple indexes |
| 2.07078 | 43.676 | 29  | 0 | 2 | 2  |                            |
| 1.99271 | 45.481 | 3   | 1 | 4 | 0  |                            |
| 1.98599 | 45.644 | 10  | 2 | 2 | −1 |                            |
| 1.97983 | 45.794 | 27  | 2 | 2 | 1  |                            |
| 1.96941 | 46.05  | 13  | 0 | 4 | 1  |                            |
| 1.9191  | 47.33  | 11  | 1 | 2 | −2 |                            |
| 1.90412 | 47.725 | 8   | 2 | 3 | 0  |                            |
| 1.83662 | 49.595 | 5   | 1 | 4 | 1  | Line with multiple indexes |
| 1.83662 | 49.595 | 5   | 1 | 4 | −1 |                            |
| 1.7633  | 51.806 | 2   | 2 | 3 | 1  |                            |
| 1.72874 | 52.922 | 37  | 2 | 0 | −2 |                            |
| 1.71999 | 53.212 | 274 | 2 | 0 | 2  | Line with multiple indexes |
| 1.71999 | 53.212 | 274 | 1 | 3 | −2 |                            |
| 1.71599 | 53.346 | 91  | 1 | 3 | 2  |                            |
| 1.69537 | 54.047 | 16  | 2 | 1 | −2 |                            |
| 1.68772 | 54.312 | 10  | 2 | 1 | 2  |                            |
| 1.65625 | 55.432 | 8   | 3 | 1 | 0  |                            |
| 1.64641 | 55.792 | 8   | 2 | 4 | 0  |                            |
| 1.64059 | 56.007 | 6   | 1 | 5 | 0  |                            |
| 1.62752 | 56.497 | 2   | 0 | 5 | 1  |                            |
| 1.60579 | 57.332 | 22  | 2 | 2 | −2 |                            |
| 1.59929 | 57.587 | 19  | 2 | 2 | 2  |                            |
| 1.59538 | 57.741 | 26  | 0 | 4 | 2  |                            |
| 1.57243 | 58.665 | 19  | 3 | 2 | 0  | Line with multiple indexes |
| 1.57243 | 58.665 | 19  | 0 | 0 | 3  |                            |
| 1.56031 | 59.166 | 19  | 3 | 1 | 1  |                            |
| 1.55578 | 59.356 | 24  | 2 | 4 | −1 |                            |
| 1.55013 | 59.594 | 25  | 1 | 5 | 1  | Line with multiple indexes |
| 1.55013 | 59.594 | 25  | 1 | 5 | −1 |                            |
| 1.54582 | 59.777 | 5   | 0 | 1 | 3  |                            |
| 1.52299 | 60.766 | 3   | 1 | 4 | −2 |                            |
| 1.49357 | 62.094 | 4   | 3 | 2 | −1 |                            |
| 1.48964 | 62.276 | 10  | 3 | 2 | 1  |                            |
| 1.48362 | 62.558 | 3   | 2 | 3 | −2 |                            |
| 1.48034 | 62.712 | 4   | 1 | 1 | −3 |                            |
| 1.47701 | 62.869 | 10  | 1 | 1 | 3  | Line with multiple indexes |
| 1.47701 | 62.869 | 10  | 0 | 2 | 3  |                            |
| 1.45718 | 63.825 | 90  | 3 | 3 | 0  |                            |
| 1.44517 | 64.419 | 49  | 0 | 6 | 0  |                            |
| 1.43059 | 65.156 | 2   | 2 | 5 | 0  |                            |
| 1.41957 | 65.726 | 2   | 1 | 2 | −3 |                            |
| 1.39376 | 67.102 | 21  | 3 | 3 | −1 |                            |

|         |        |    |   |   |    |                            |
|---------|--------|----|---|---|----|----------------------------|
| 1.39056 | 67.277 | 21 | 3 | 3 | 1  | Line with multiple indexes |
| 1.39056 | 67.277 | 21 | 1 | 6 | 0  |                            |
| 1.38167 | 67.768 | 24 | 0 | 6 | 1  | Line with multiple indexes |
| 1.38167 | 67.768 | 24 | 0 | 3 | 3  |                            |
| 1.3679  | 68.545 | 3  | 2 | 5 | 1  |                            |
| 1.35799 | 69.115 | 2  | 3 | 1 | −2 |                            |
| 1.35158 | 69.49  | 11 | 3 | 1 | 2  | Line with multiple indexes |
| 1.35158 | 69.49  | 11 | 2 | 4 | −2 |                            |
| 1.34739 | 69.737 | 10 | 1 | 5 | −2 | Line with multiple indexes |
| 1.34739 | 69.737 | 10 | 2 | 4 | 2  |                            |
| 1.34546 | 69.852 | 7  | 1 | 5 | 2  |                            |

It is pointed out that the entries of these tables, marked with red color, are highlighted in our experimental X-ray diffraction patterns, observed in Figure 2&4 of the manuscript.

## References

1. Gates-Rector, S.; Blanton, T. The Powder Diffraction File: a quality materials characterization database. *Powder Diffraction* **2019**, *34*, 352–360.
